# Supplementary material for: Assessing HDL Metabolism in Subjects with Elevated Levels of HDL Cholesterol and Coronary Artery Disease
Source: MDPI journal article supplement (doi:10.3390/molecules26226862), 2021-11-14
Supplement: s1 [file s1]

## *Supplementary Material*

# **Assessing HDL Metabolism in Subjects with Elevated Levels of HDL Cholesterol and Coronary Artery Disease**

**William Hancock-Cerutti <sup>1†</sup>, John S. Millar <sup>1</sup>, Silvia Valentini <sup>1‡</sup>, Jason Liu <sup>1</sup>, Jeffrey T. Billheimer <sup>1</sup>, Daniel J. Rader <sup>1</sup> and Marina Cuchel <sup>1,\*</sup>**

1. Division of Translational Medicine and Human Genetics, Perelman School of Medicine University of Pennsylvania, Philadelphia, PA, USA; william.hancock-cerutti@yale.edu (W.H.-C.); jsmillar@pennmedicine.upenn.edu (J.S.M.); dottvalentini@gmail.com (S.V.); jasonyliumd@gmail.com (J.L.); billheij@pennmedicine.upenn.edu (J.T.B.); rader@pennmedicine.upenn.edu (D.J.R.)

† Yale School of Medicine, New Haven, CT, 06519 USA

‡ Unità Operativa Complessa Medicina e Chirurgia D'urgenza, Accettazione e Pronto Soccorso, Azienda Usl Toscana Sud Est, Grosseto, 58100 Italy

\* Correspondence: mcuchel@pennmedicine.upenn.edu

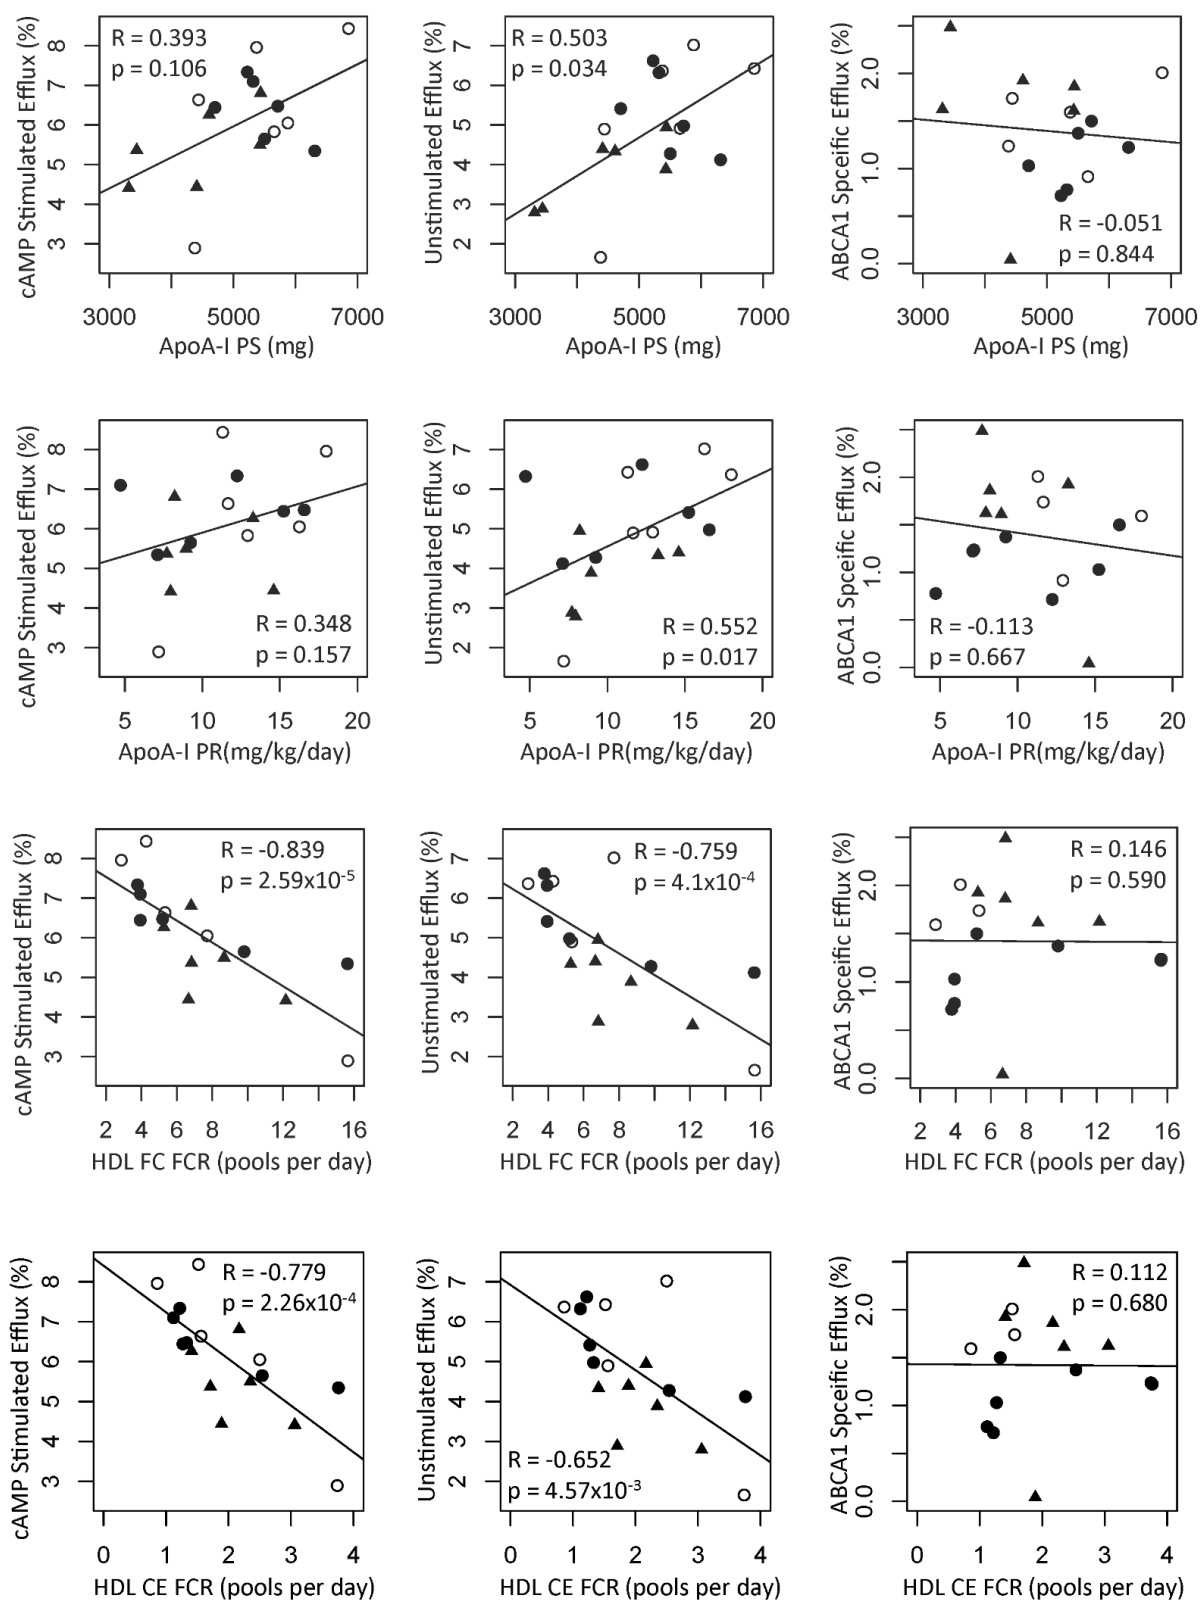

**Figure S1.** Scatterplots showing the relationships between selected HDL kinetic parameters and ex vivo cholesterol efflux. Empty circles denote High HDL CAD (+) subjects, filled circles denote High HDL CAD (-) subjects, and filled triangles denote normal controls. R = Spearman Correlation Coefficient.
